# Supplementary material for: The stalk-eyed fly as a model for aggression – is there a conserved role for 5-HT between vertebrates and invertebrates?
Source: Oxford University Press journal article supplement (doi:10.1242/jeb.132159), 2020-01-01
Supplement: jeb132159supp.pdf [file jeb132159supp.pdf]

**Table S1: Summary of Effects of Serotonin on Aggression**

| Study Species      | Study Results                                                                                                                                                                                                                                                                                                                                                                                                                                                                                                                                                                                                                                                                                                                                                                                                                                                                                                                                                                                                                                                                                                                                                                                                                                                             | Evidence of 5HT increasing or decreasing aggression |
|--------------------|---------------------------------------------------------------------------------------------------------------------------------------------------------------------------------------------------------------------------------------------------------------------------------------------------------------------------------------------------------------------------------------------------------------------------------------------------------------------------------------------------------------------------------------------------------------------------------------------------------------------------------------------------------------------------------------------------------------------------------------------------------------------------------------------------------------------------------------------------------------------------------------------------------------------------------------------------------------------------------------------------------------------------------------------------------------------------------------------------------------------------------------------------------------------------------------------------------------------------------------------------------------------------|-----------------------------------------------------|
| <b>Vertebrates</b> |                                                                                                                                                                                                                                                                                                                                                                                                                                                                                                                                                                                                                                                                                                                                                                                                                                                                                                                                                                                                                                                                                                                                                                                                                                                                           |                                                     |
| Mice               | <ul style="list-style-type: none"> <li>• <i>Tryptophan-hydroxylase 2</i>-deficient (<i>Tph2</i><sup>-/-</sup>) mice exhibited higher aggression in resident-intruder paradigm (Mosienko et al., 2012 )</li> <li>• Citalopram (selective 5-HT reuptake inhibitor, SSRI)-injected mice exhibited less aggression (Caldwell and Miczek, 2008)</li> <li>• Male and female homozygous 5-HT transporter (SERT) knockouts exhibited less aggression (Holmes et al., 2002; Heiming et al., 2013)</li> <li>• Suppression of 5-HT firing by genetically overexpressing the Htr1a autoreceptor increased aggression (Audero et al., 2013)</li> </ul>                                                                                                                                                                                                                                                                                                                                                                                                                                                                                                                                                                                                                                 | Decreasing                                          |
| Humans             | <ul style="list-style-type: none"> <li>• Individuals with <i>tryptophan-hydroxylase 2 (TPH2)</i> “risk” haplotype exhibited higher aggression levels (Perez-Rodrigues et al., 2010)</li> <li>• Violent antisocial behavior consistently associated with lower 5-HIAA (5-HT metabolite) in cerebrospinal fluid (Moore et al., 2002)</li> <li>• Selective 5-HT reuptake inhibitor (SSRI) treatment reduces measures of impulsive aggression (Coccaro et al., 1997; Reist et al., 2003; New et al., 2004)</li> <li>• Lower SERT distribution (indicating less 5-HT terminals) in anterior cingulate cortex of individuals with impulsive aggression (Frankle et al., 2005)</li> </ul>                                                                                                                                                                                                                                                                                                                                                                                                                                                                                                                                                                                        | Decreasing                                          |
| Rats               | <ul style="list-style-type: none"> <li>• Rats with 5,7-dihydroxytryptamine (5,7-DHT) injections that decreased brain 5-HT levels exhibited higher levels of killing behavior (Vergnes and Kempf, 1982)</li> <li>• Aggression reduced by systemic injections of 5-HT<sub>1A</sub> agonists (Blanchard et al., 1988; Nikulina et al., 1992)</li> <li>• Systemic 5-HT<sub>2</sub> agonists reduce territorial aggression in male rats (Muehlenkamp et al., 1995)</li> <li>• Intracerebroventricular (icv.) infusion of 5-HT<sub>1B</sub> agonists reduces territorial aggression in male rats (Mos et al., 1992)</li> <li>• Decreased 5-HT release in prefrontal cortex during and after aggressive behavior in male rats (van Erp and Miczek, 2000)</li> <li>• Homozygous SERT knockout male rats display less territorial aggression (Homberg et al., 2007)</li> <li>• Lesioning 5-HT cell bodies in female rats reduces maternal aggression (Holschbach et al., 2018)</li> <li>• Activation of 5-HT<sub>1A</sub> autoreceptors in dorsal raphe (to suppress 5-HT firing) reduces maternal aggression (da Veiga et al., 2011)</li> <li>• Partial depletion of brain 5-HT increases aggressiveness in naturally low-aggressive male rats (Wallinga et al., 2009)</li> </ul> | Decreasing (males)<br><br>Increasing (females)      |

|                      |                                                                                                                                                                                                                                                                                                                                                                                                                                                                                                                                                                                                                                                                                                                                                        |                                                       |
|----------------------|--------------------------------------------------------------------------------------------------------------------------------------------------------------------------------------------------------------------------------------------------------------------------------------------------------------------------------------------------------------------------------------------------------------------------------------------------------------------------------------------------------------------------------------------------------------------------------------------------------------------------------------------------------------------------------------------------------------------------------------------------------|-------------------------------------------------------|
| Hamsters             | <ul style="list-style-type: none"> <li>• Subcortical brain regions associated with aggression show less 5-HT innervation in highly aggressive male golden hamsters (Cervantes and Delville, 2007)</li> <li>• Intracerebroventricular (icv.) infusions of 5-HT<sub>1A</sub> agonists decreased aggression in males but not females, while 5-HT<sub>1B</sub> infusions were ineffective in both sexes (Joppa et al., 1997)</li> <li>• 5-HT<sub>1A</sub> agonist injections into the hypothalamus inhibited aggression in male Syrian hamsters, but increased aggression in females (Terranova et al., 2016)</li> <li>• Dominant female Syrian hamsters show increased activation of 5-HT neurons in the dorsal raphe (Terranova et al., 2016)</li> </ul> | <p>Decreasing (males)</p> <p>Increasing (females)</p> |
| Prairie Voles        | <ul style="list-style-type: none"> <li>• Fluoxetine (SSRI)-treated males exhibited less aggressive behavior, but fluoxetine-treated females exhibited no changes in aggression (Villalba et al., 1997)</li> </ul>                                                                                                                                                                                                                                                                                                                                                                                                                                                                                                                                      | <p>Decreasing (males)</p> <p>No Effect (females)</p>  |
| Birds                | <ul style="list-style-type: none"> <li>• Injections of either fluoxetine (SSRI) or 5-HT<sub>1A</sub> agonist reduce territorial aggression in male song sparrows (Sperry et al., 2003)</li> <li>• Aggression in known submissive pigeons is increased following partial brain depletion of 5-HT (Ison et al., 1996)</li> <li>• Injections of 5-hydroxytryptophan (5-HT precursor) decrease aggression in dominant pigeons (Fachinelli et al., 1989)</li> </ul>                                                                                                                                                                                                                                                                                         | Decreasing                                            |
| Reptiles             | <ul style="list-style-type: none"> <li>• Fluoxetine (SSRI) injection reduced aggressive responses in male green anole lizards (Deckel, 1996)</li> <li>• Dominant male green anoles treated with sertraline (SSRI) exhibited less aggressive displays (Larson and Summers, 2001)</li> <li>• Baseline 5-HT activity in brain regions associated with aggression is lower in dominant male green anoles (Summers et al., 2005)</li> </ul>                                                                                                                                                                                                                                                                                                                 | Decreasing                                            |
| Amphibians           | <ul style="list-style-type: none"> <li>• Territorial calling and defense in male coqui frogs are decreased by repeated systemic injections of either fluoxetine (SSRI) or 5-HT<sub>1A</sub> agonists or 5-HT<sub>2AC</sub> agonists (Ten Eyck, 2008; Ten Eyck and Regen, 2014)</li> </ul>                                                                                                                                                                                                                                                                                                                                                                                                                                                              | Decreasing                                            |
| Fish                 | <ul style="list-style-type: none"> <li>• Atlantic cod fed food supplemented with the 5-HT precursor L-tryptophan (TRP) exhibited less aggressive acts (Höglund et al., 2005)</li> <li>• Rainbow trout fed supplemental TRP exhibited less aggression (Winberg et al., 2001)</li> <li>• Siamese fighting fish and wildtype zebrafish in water treated with fluoxetine (SSRI) demonstrated a lower number of aggressive attacks than controls (Kohlert et al., 2012; Norton et al., 2011)</li> <li>• Male bluehead wrasse injected with fluoxetine (SSRI) exhibited less aggressive behavior than controls (Perreault et al., 2003)</li> </ul>                                                                                                           | Decreasing                                            |
| <b>Invertebrates</b> |                                                                                                                                                                                                                                                                                                                                                                                                                                                                                                                                                                                                                                                                                                                                                        |                                                       |
| <b>Arthropods</b>    |                                                                                                                                                                                                                                                                                                                                                                                                                                                                                                                                                                                                                                                                                                                                                        |                                                       |

| Crustaceans                                    |                                                                                                                                                                                                                                                                                                                                                                                                                                                                                                                                                                                                                                                                                                                                                                                                                                                                                                                                                                        |                      |
|------------------------------------------------|------------------------------------------------------------------------------------------------------------------------------------------------------------------------------------------------------------------------------------------------------------------------------------------------------------------------------------------------------------------------------------------------------------------------------------------------------------------------------------------------------------------------------------------------------------------------------------------------------------------------------------------------------------------------------------------------------------------------------------------------------------------------------------------------------------------------------------------------------------------------------------------------------------------------------------------------------------------------|----------------------|
| Lobsters                                       | <ul style="list-style-type: none"> <li>• 5-HT-injected squat lobsters (<i>Munida quadrispina</i>) exhibited more aggressive postures in isolation and increased territorial aggression towards untreated intruders (Antonsen and Paul, 1997)</li> <li>• Duration and intensity of fights are increased after 5HT injection in American lobsters (<i>Homarus americanus</i>, Huber et al., 1997)</li> <li>• Fight winning and territorial possession in juvenile American lobsters (<i>H. americanus</i>) are not affected by low dose 5-HT injection, while high dose 5-HT promotes subordination (Peeke et al., 2000)</li> <li>• Discrete aggressive behaviors during intrasexual fights between size-matched juvenile <i>H. americanus</i> are increased by injections of 5-carboxamidotryptamine maleate (agonist for 5-HT<sub>1</sub>, 5-HT<sub>5</sub>, and 5-HT<sub>7</sub> receptors) but decreased by 5-HT injection (Tierney and Mangiamele, 2001)</li> </ul> | Generally Increasing |
| Crayfish                                       | <ul style="list-style-type: none"> <li>• 5-HT-injected subordinate <i>Astacus astacus</i> crayfish were more willing to engage with dominants (Huber et al., 1997)</li> <li>• 5-HT-injected small <i>Procambarus clarkii</i> crayfish were more likely to win fights against larger, untreated crayfish, with retention of dominance towards new larger opponents enhanced by fluoxetine (SSRI) (Momohara et al., 2013)</li> <li>• 5-HT injections delay decision to retreat during fights (Bacque-Cazenave et al., 2018)</li> <li>• Chronic 5-HT administration increases fight intensity in size-matched <i>Orconectes rusticus</i> crayfish (Panksepp and Huber, 2002)</li> </ul>                                                                                                                                                                                                                                                                                   | Increasing           |
| Crabs                                          | <ul style="list-style-type: none"> <li>• Male <i>Neohelice granulatus</i> crabs injected with 5-HT display more approaches and attacks than vehicle-treated opponents (Pedetta et al., 2010)</li> <li>• Male shore crabs (<i>Carcinus maenas</i>) that win fights have higher endogenous circulating 5-HT than losers, both at rest and post-contest (Sneddon et al., 2000)</li> <li>• No change in aggression (towards mirror image) following injection of fluoxetine (SSRI) in striped shore crabs (<i>Pachygrapsus crassipes</i>, Hamilton et al., 2016)</li> </ul>                                                                                                                                                                                                                                                                                                                                                                                                | Generally Increasing |
| Insects                                        |                                                                                                                                                                                                                                                                                                                                                                                                                                                                                                                                                                                                                                                                                                                                                                                                                                                                                                                                                                        |                      |
| Fruit Flies ( <i>Drosophila melanogaster</i> ) | <ul style="list-style-type: none"> <li>• <i>TRH-Gal4</i> driver flies with reduced 5-HT neurotransmission exhibited less aggressive behaviors (Alekseyenko et al., 2010)</li> <li>• Drug-induced increase of 5-HT in fly brain increased aggression (Dierick and Greenspan, 2007)</li> <li>• Drug-induced decrease of 5-HT only modestly lowered fighting frequencies (Dierick and Greenspan, 2007)</li> </ul>                                                                                                                                                                                                                                                                                                                                                                                                                                                                                                                                                         | Increasing           |

|                                                   |                                                                                                                                                                                                                                                                                                                                                                                                                                                                                                                                                                                                                                                                                                                                                                                                                                                                                                                                                                                        |                             |
|---------------------------------------------------|----------------------------------------------------------------------------------------------------------------------------------------------------------------------------------------------------------------------------------------------------------------------------------------------------------------------------------------------------------------------------------------------------------------------------------------------------------------------------------------------------------------------------------------------------------------------------------------------------------------------------------------------------------------------------------------------------------------------------------------------------------------------------------------------------------------------------------------------------------------------------------------------------------------------------------------------------------------------------------------|-----------------------------|
| Stalk-eyed flies<br>( <i>Teleopsis dalmanni</i> ) | <ul style="list-style-type: none"> <li>• 5-HTP (5-HT precursor)-treated flies won more contests than untreated flies (Bubak et al., 2014)</li> <li>• Smaller, 5-HT-treated opponents had higher levels of high-intensity aggressive behaviors (Bubak et al., 2015)</li> <li>• 5-HTP-treated flies had a higher probability of winning contests (Bubak et al., 2013)</li> </ul>                                                                                                                                                                                                                                                                                                                                                                                                                                                                                                                                                                                                         | Increasing                  |
| Crickets<br>( <i>Gryllus bimaculatus</i> )        | <ul style="list-style-type: none"> <li>• 5-HTP (5-HT precursor)-injected males exhibited more aggressive postures and behaviors (Dyakonova and Krushinsky, 2013)</li> <li>• Male crickets treated with either AMTP (5-HT synthesis inhibitor), 5-HT antagonists, 5-HTP (5-HT precursor) or fluoxetine (SSRI) exhibited no change in aggressive or submissive behaviors during an initial fight (Stevenson et al., 2000; Rillich and Stevenson, 2018)</li> <li>• Injection of AMTP (5-HT synthesis inhibitor) promotes recovery of aggression in losing males, but only after they have fought (Rillich and Stevenson, 2018)</li> <li>• Injection of fluoxetine (SSRI) promotes losing in males (Abbey-Lee et al., 2018)</li> </ul>                                                                                                                                                                                                                                                     | Mixed, trend for decreasing |
| Ants                                              | <ul style="list-style-type: none"> <li>• Oral administration of 5-HTP (5-HT precursor) increases aggression towards non-nestmates in pavement ants (<i>Tetramorium caespitum</i>) (Bubak et al., 2016)</li> <li>• 5-HT-administration to <i>Formica polyctena</i> ants promoted some aspects of aggressive behavior towards non-conspecifics (<i>F. fusca</i>) and potential prey (house cricket nymphs), but had no effect on conspecific aggression (Szczyka et al., 2013)</li> <li>• 5-HT and 5-HTP injections increased percentage of ants (<i>Formica rufa</i>) fighting amongst themselves (Kostowski and Tarchalska, 1972)</li> <li>• Endogenous 5-HT decreases in subordinate worker ants (<i>Harpegnathos saltator</i>) following formation and reinforcement of social hierarchy (Penick et al., 2014)</li> <li>• Endogenous 5-HT is highest in <i>H. saltator</i> ants of the foraging caste, which are known to actively attack intruders (Penick et al., 2014)</li> </ul> | Increasing                  |
| Honey bees                                        | <ul style="list-style-type: none"> <li>• 5-HT application increases likelihood of stinging attacks during colony defense (Nouvian et al., 2018)</li> </ul>                                                                                                                                                                                                                                                                                                                                                                                                                                                                                                                                                                                                                                                                                                                                                                                                                             |                             |
| <b>Molluscs (Cephalopods)</b>                     |                                                                                                                                                                                                                                                                                                                                                                                                                                                                                                                                                                                                                                                                                                                                                                                                                                                                                                                                                                                        |                             |
| Octopus                                           | <ul style="list-style-type: none"> <li>• MDMA (SSRI) enhanced pro-social (non-aggressive) behaviors (Edsinger and Dörlund, 2018)</li> </ul>                                                                                                                                                                                                                                                                                                                                                                                                                                                                                                                                                                                                                                                                                                                                                                                                                                            | Decreasing                  |

## References

- Abbey-Lee, R. N., Uhrig, E. J., Garnham, L., Lundgren, K., Child, S. and Løvlie, H. (2018). Experimental manipulation of monoamine levels alters personality in crickets. *Scientific Reports* 8, 16211.
- Alekseyenko, O. V., Lee, C., and Kravitz E.A. (2010). Targeted manipulation of serotonergic neurotransmission affects the escalation of aggression in adult male *Drosophila melanogaster*. *Plos One* 5, e10806.
- Antonsen, B. L., and Paul, D. H. (1997). Serotonin and octopamine elicit stereotypical agonistic behaviors in the squat lobster *Munida quadrispina* (Anomura, Galatheidae). *J Comp Physiol A* 181, 501-510.
- Audero, E., Mlinar, B., Baccini, G., Skachokova, Z. K., Corradetti, R., and Gross, C. (2013). Suppression of serotonin neuron firing increases aggression in mice. *J Neurosci* 33, 8678-8688.
- Bacqué-Cazenave, J., Cattaert, D., Delbecque, J. P., and Fossat, P. (2018). Alteration of size perception: serotonin has opposite effects on the aggressiveness of crayfish confronting either a smaller or a larger rival. *J Exp Biol.* 221, jeb177840.
- Blanchard, D. C., Rodgers, R. J., Hendrie, C. A. and Hori, K. (1988). ‘Taming’ of wild rats (*Rattus rattus*) by 5HT1A agonists buspirone and gepirone. *Pharmacology Biochemistry and Behavior* 31, 269-278.
- Bubak, A. N., Renner, K. J., and Swallow, J. G. (2014) Heightened serotonin influences contest outcome and enhances expression of high-intensity aggressive behaviors. *Behav Brain Res* 259, 137-142.
- Bubak, A. N., Rieger, N. S., Watt, M. J., Renner, K. J., and Swallow, J. G. (2015). David vs. Goliath: Serotonin modulates opponent perception between smaller and larger rivals. *Behav Brain Res* 292, 521-527.
- Bubak, A. N., Swallow, J. G., and Renner, K. J. (2013). Whole brain monoamine detection and manipulation in a stalk-eyed fly. *J Neurosci Methods* 219, 124-130.
- Bubak, A. N., Yaeger, J. D. W., Renner, K. J., Swallow, J. G. and Greene, M. J. (2016). Neuromodulation of Nestmate Recognition Decisions by Pavement Ants. *PLoS One* 11, e0166417.
- Caldwell, E. E., and Miczek, K. A. (2008). Long-term citalopram maintenance in mice: selective reduction of alcohol-heightened aggression. *Psychopharmacology* 196, 407-416.
- Cervantes, M. C., and Delville, Y. (2007). Individual differences in offensive aggression in golden hamsters: a model of reactive and impulsive aggression? *Neuroscience* 150, 511-521.

Coccaro, E. F. and Kavoussi, R. J. (1997). Fluoxetine and impulsive aggressive behavior in personality-disordered subjects. *JAMA Psychiatry* 54, 1081-1088.

da Veiga, C. P., Miczek, K. A., Lucion, A. B. and de Almeida, R. M. (2011). Social instigation and aggression in postpartum female rats: role of 5-HT<sub>1A</sub> and 5-HT<sub>1B</sub> receptors in the dorsal raphe nucleus and prefrontal cortex. *Psychopharmacology (Berl)* 213, 475-87.

Deckel, A. W. (1996). Behavioral changes in *Anolis carolinensis* following injection with fluoxetine. *Behav Brain Res* 78, 175-182.

Dierick, H.A., and Greenspan R. J. (2007). Serotonin and neuropeptide F have opposite modulatory effects on fly aggression. *Nat Genet* 39, 678-682.

Dyakonova, V.E., and Krushinsky, A. L. (2013). Serotonin precursor (5-hydroxytryptophan) causes substantial changes in the fighting behavior of male crickets, *Gryllus bimaculatus*. *J Comp Physiol A* 199, 601-609.

Edsinger, E., and Dölen, G. (2018). A conserved role for serotonergic neurotransmission in mediating social behavior in octopus. *Current Biology* 28, 3136-3142.

Fachinelli, C., Sargo, S., Bataller, R., and Rodríguez Echandía, E. L. (1989). Effect of 5-HTP and ketanserine on the aggressive reaction induced by food competition in dominant and submissive pigeons (*Columba livia*). *Behavioural Brain Research* 35, 265-270.

Frankle, W. G., Lombardo, I., New, A. S., Goodman, M., Talbot, P. S., Huang, Y., Hwang, D-R., Slifstein, M., Curry, S., Abi-Dargham, A., et al. (2005). Brain serotonin transporter distribution in subjects with impulsive aggressivity: A positron emission study with [<sup>11</sup>C]McN 5652. *American Journal of Psychiatry* 162, 915-923.

Hamilton, T. J., Kwan, G. T., Gallup, J. and Tresguerres, M. (2016). Acute fluoxetine exposure alters crab anxiety-like behaviour, but not aggressiveness. *Scientific Reports* 6, 19850.

Heiming, R. S., Monning, A., Jansen, F., Kloke, V., Lesch, K. P., and Sachser, N. (2013). To attack, or not to attack? The role of serotonin transporter genotype in the display of maternal aggression. *Behav Brain Res* 242, 135-141.

Höglund, E., Bakke, M. J., Øverli, Ø., Winberg, S., and Nilsson, G. E. (2005). Suppression of aggressive behaviour in juvenile Atlantic cod (*Gadus morhua*) by L-tryptophan supplementation. *Aquaculture* 249, 525-531.

Holmes, A., Murphy, D. L. and Crawley, J. N. (2002). Reduced aggression in mice lacking the serotonin transporter. *Psychopharmacology* 161, 160-167.

Holschbach, M. A., Vitale, E. M. and Lonstein, J. S. (2018). Serotonin-specific lesions of the dorsal raphe disrupt maternal aggression and caregiving in postpartum rats. *Behavioural Brain Research* 348, 53-64.

Homberg, J. R., Pattij, T., Janssen, M. C. W., Ronken, E., De Boer, S. F., Schoffelmeer, A. N. M. and Cuppen, E. (2007). Serotonin transporter deficiency in rats improves inhibitory control but not behavioural flexibility. *European Journal of Neuroscience* 26, 2066-2073.

Huber R, Smith K, Delago A, Isaksson, K., and Kravitz, E. A. (1997). Serotonin and aggressive motivation in crustaceans: Altering the decision to retreat. *PNAS* 94, 5939-5942.

Ison, M., Fachinelli, C. and Echandía, E. L. R. (1996). Effect of the ICV injection of 5,7-dihydroxytryptamine on the aggressive behavior of dominant and submissive pigeons (*Columba livia*). *Pharmacology Biochemistry and Behavior* 53, 951-955.

Joppa, M. A., Rowe, R. K., and Meisel, R. L. (1997). Effects of serotonin 1A or 1B receptor agonists on social aggression in male and female Syrian hamsters. *Pharmacol Biochem Behavior* 58, 349-353.

Kohlert, J. G., Mangan, B. P., Kodra, C., Drako, L., Long, E., and Simpson, H. (2012). Decreased Aggressive and Locomotor Behaviors in Betta Splendens after Exposure to Fluoxetine. *Psychol Rep* 110, 51-62.

Kostowski, W., and Tarchalska, B. (1972). The effects of some drugs affecting brain 5-HT on the aggressive behaviour and spontaneous electrical activity of the central nervous system of the ant, *Formica rufa*. *Brain Res* 38, 143-149.

Larson, E. T., and Summers, C. H. (2001). Serotonin reverses dominant social status. *Behav Brain Res* 121, 95-102.

Momohara Y, Kanai A, and Nagayama T. (2013). Aminergic control of social status in crayfish agonistic encounters. *Plos One* 8, e74489.

Moore, T. M., Scarpa, A. and Raine, A. (2002). A meta-analysis of serotonin metabolite 5-HIAA and antisocial behavior. *Aggressive Behavior* 28, 299-316.

Mos, J., Olivier, B., Poth, M. and van Aken, H. (1992). The effects of intraventricular administration of eltoprazine, 1-(3-trifluoromethylphenyl) piperazine hydrochloride and 8-hydroxy-2-(di-n-propylamino) tetralin on resident intruder aggression in the rat. *Eur J Pharmacol* 212, 295-298.

Mosienko. V., Bert, B., Beis, D., Matthes, S., Fink, H., Bader, M., and Alenina, N. (2012). Exaggerated aggression and decreased anxiety in mice deficient in brain serotonin. *Transl Psychiatry* 2, e122.



Muehlenkamp, F., Lucion, A., and Vogel, W. H. (1995). Effects of selective serotonergic agonists on aggressive behavior in rats. *Pharmacol Biochem Behav* 50, 671-674.

New, A. S., Buchsbaum, M. S., Hazlett, E. A., Goodman, M., Koenigsberg, H. W., Lo, J., Iskander, L., Newmark, R., Brand, J., O'Flynn, K. et al. (2004). Fluoxetine increases relative metabolic rate in prefrontal cortex in impulsive aggression. *Psychopharmacology* 176, 451-458.

Nikulina, E. M., Avgustinovich, D. F. and Popova, N. K. (1992). Role of 5HT1A receptors in a variety of kinds of aggressive behavior in wild rats and counterparts selected for low defensiveness towards man. *Aggressive Behavior* 18, 357-364.

Norton, W. H. J., Stumpfenhorst, K., Faus-Kessler, T., Folchert, A., Rohner, N., Harris, M. P., Callebert, J. and Bally-Cuif, L. (2011). Modulation of Fgfr1a Signaling in Zebrafish Reveals a Genetic Basis for the Aggression–Boldness Syndrome. *The Journal of Neuroscience* 31, 13796-13807.

Nouvian, M., Mandal, S., Jamme, C., Claudianos, C., d'Ettoire, P., Reinhard, J., Barron, A. B. and Giurfa, M. (2018). Cooperative defence operates by social modulation of biogenic amine levels in the honey bee brain. *Proceedings of the Royal Society B: Biological Sciences* 285, 20172653.

Panksepp, J.B., and Huber, R. (2002). Chronic alterations in serotonin function: Dynamic neurochemical properties in agonistic behavior of the crayfish, *Orconectes rusticus*. *Journal of Neurobiology* 50, 276-290.

Pedetta, S., Kaczer, L. and Maldonado, H. (2010). Individual aggressiveness in the crab *Chasmagnathus*: Influence in fight outcome and modulation by serotonin and octopamine. *Physiology & Behavior* 101, 438-445.

Peeke, H. V. S., Blank, G. S., Figler, M. H. and Chang, E. S. (2000). Effects of exogenous serotonin on a motor behavior and shelter competition in juvenile lobsters (*Homarus americanus*). *Journal of Comparative Physiology A* 186, 575-582.

Penick, C. A., Brent, C. S., Dolezal, K. and Liebig, J. (2014). Neurohormonal changes associated with ritualized combat and the formation of a reproductive hierarchy in the ant *Harpegnathos saltator*. *J Exp Biol* 217, 1496-1503.

Perez-Rodriguez, M. M., Weinstein, S., New, A. S., Bevilacqua, L., Yuan, Q. P., Zhou, Z. F., Hodgkinson, C., Goodman, M., Koenigsberg, H. W., Goldman, D., and Siever, L. J. (2010). Tryptophan-hydroxylase 2 haplotype association with borderline personality disorder and aggression in a sample of patients with personality disorders and healthy controls. *J Psychiatr Res* 44, 1075-1081.

Perreault, H. A. N., Semsar, K., and Godwin, J. (2003). Fluoxetine treatment decreases territorial aggression in a coral reef fish. *Physiology & Behavior* 79, 719-724.



Reist, C., Nakamura, K., Sagart, E., Sokolski, K. N. and Fujimoto, K. A. (2003). Impulsive aggressive behavior: open-label treatment with citalopram. *J Clin Psychiatry* 64, 81-85.

Rillich, J., and Stevenson, P. A. (2018). Serotonin mediates depression of aggression after acute and chronic social defeat stress in a model insect. *Frontiers in Behavioral Neuroscience* 12, 233.

Sneddon, L. U., Taylor, A. C., Huntingford, F. A. and Watson, D. G. (2000). Agonistic behaviour and biogenic amines in shore crabs *Carcinus maenas*. *Journal of Experimental Biology* 203, 537-545.

Sperry, T. S., Thompson, C. K. and Wingfield, J. C. (2003). Effects of acute treatment with 8-OH-DPAT and fluoxetine on aggressive behaviour in male song sparrows (*Melospiza melodia morphna*). *J Neuroendocrinol* 15, 150-60.

Stevenson, P. A., Hofmann, H.A., Schoch, K., and Schildberger, K. (2000). The fight and flight responses of crickets depleted of biogenic amines. *J. Neurobiol.* 43, 107-120.

Summers, C. H., Korzan, W. J., Lukkes, J. L., Watt, M. J., Forster, G. L., Øverli, Ø., Höglund, E., Larson, E. T., Ronan, P. J., Matter, J., M., Summers, T. R., Renner, K. J., and Greenberg, N. (2005a). Does serotonin influence aggression? comparing regional activity before and during social interaction. *Physiol Biochem Zool* 78, 679-694.

Szczuka, A., Korczynska, J., Wnuk, A., Symonowicz, B., Szwacka, A. G., Mazurkiewicz, P., Kostowski, W., and Godzinska, E. J. (2013). The effects of serotonin, dopamine, octopamine and tyramine on behavior of workers of the ant *Formica polyctena* during dyadic aggression tests. *Acta Neurobiol Exp* 73, 495-520.

Ten Eyck, G. R. (2008). Serotonin modulates vocalizations and territorial behavior in an amphibian. *Behavioural brain research*, 193(1), 144-147.

Ten Eyck, G. R. and Regen, E. M. (2014). Chronic fluoxetine treatment promotes submissive behavior in the territorial frog, *Eleutherodactylus coqui*. *Pharmacology Biochemistry and Behavior* 124, 86-91.

Terranova, J. I., Song, Z. M., Larkin, T.E., Hardcastle, N., Norvelle, A., Riaz, A., and Albers, H. E (2016). Serotonin and arginine-vasopressin mediate sex differences in the regulation of dominance and aggression by the social brain. *PNAS* 113, 13233-13238.

Tierney, A. and Mangiamele, L. (2001). Effects of serotonin and serotonin analogs on posture and agonistic behavior in crayfish. *Journal of Comparative Physiology A* 187, 757-767.

van Erp, A. M., and Miczek, K. A. (2000). Aggressive behavior, increased accumbal dopamine, and decreased cortical serotonin in rats. *J Neurosci* 20, 9320-9325.

- Vergnes, M., and Kempf, E. (1982). Effect of hypothalamic injections of 5,7-dihydroxytryptamine on elicitation of mouse-killing in rats. *Behav Brain Res* 5, 387-397.
- Villalba, C., Boyle, P. A., Caliguri, E. J., and De Vries, G. J. (1997). Effects of the selective serotonin reuptake inhibitor fluoxetine on social behaviors in male and female prairie voles (*Microtus ochrogaster*). *Hormones Behav* 32, 184-191.
- Wallinga, A. E., ten Voorde, A. M., de Boer, S. F., Koolhaas, J. M. and Buwalda, B. (2009). MDMA-induced serotonergic neurotoxicity enhances aggressiveness in low- but not high-aggressive rats. *Eur J Pharmacol* 618, 22-27.
- Winberg, S., Øverli, O., and Lepage, O. (2001). Suppression of aggression in rainbow trout (*Oncorhynchus mykiss*) by dietary L-tryptophan. *Journal of Experimental Biology* 204, 3867-3876.
